# Supplementary material for: MutationTaster2021
Source: PubMed Central journal article supplement (PMC8262698; doi:10.1093/nar/gkab266), 2021-04-24
Supplement: gkab266_supplemental_file.pdf [file gkab266_supplemental_file.pdf]

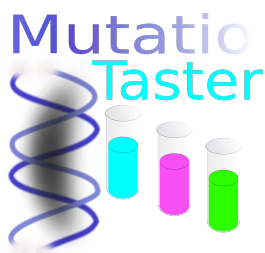

# MutationTaster2021

## Supplement

Robin Steinhaus<sup>1,2</sup>, Sebastian Proft<sup>1,2</sup>, Markus Schuelke<sup>3,4</sup>, David N. Cooper<sup>5</sup>, Jana Marie Schwarz<sup>3</sup>, and Dominik Seelow<sup>1,2,\*</sup>

<sup>1</sup> Berliner Institut für Gesundheitsforschung in der Charité – Universitätsmedizin Berlin, Berlin, 10117, Germany

<sup>2</sup> Institut für Medizinische Genetik und Humangenetik, Charité – Universitätsmedizin Berlin, corporate member of Freie Universität Berlin and Humboldt-Universität zu Berlin, Berlin, 10117, Germany

<sup>3</sup> Klinik für Pädiatrie m.S. Neurologie, Charité – Universitätsmedizin Berlin, corporate member of Freie Universität Berlin and Humboldt-Universität zu Berlin, Berlin, 10117, Germany

<sup>4</sup> NeuroCore Clinical Research Center, Charité – Universitätsmedizin Berlin, corporate member of Freie Universität Berlin and Humboldt-Universität zu Berlin, Berlin, 10117, Germany

<sup>5</sup> Institute of Medical Genetics, School of Medicine, Cardiff University, Cardiff, CF14 4XW, UK

\* To whom correspondence should be addressed. Tel: +49 30 450 543684; Fax: +49 30 7543906; Email: dominik.seelow@charite.de

## SUPPLEMENTARY TABLES

**Supplementary Table S1. Variants used to train the classification models**

| Model              | Benign [n] | Deleterious [n] |                                    |
|--------------------|------------|-----------------|------------------------------------|
| <b>variants</b>    | 11168768   | 236400          | all variants                       |
| <b>without_aae</b> | 30984304   | 81843           | non-coding                         |
| <b>simple_aae</b>  | 507702     | 270634          | affecting a single amino acid      |
| <b>complex_aae</b> | 32432      | 349660          | affecting more than one amino acid |
| <b>3utr</b>        | 415995     | 816             | located in the 3' UTR              |
| <b>5utr</b>        | 112176     | 923             | located in the 5' UTR              |

This table shows the number of cases used to train the five different models used by MutationTaster2021. It should be noted that due to the existence of multiple transcripts, a variant can lead to more than one training case. For variants that could be assigned to either the *simple\_aae* or the *complex\_aae* model, all non-coding cases (i.e. intron locations in other transcripts) were removed.

**Supplementary Table S2. Predictive performance of MutationTaster2021**

|                                   | without_aae | simple_aae | complex_aae | 3utr   | 5utr  |
|-----------------------------------|-------------|------------|-------------|--------|-------|
| <b>Training cases [n]</b>         | 23299610    | 583752     | 286569      | 312608 | 84824 |
| <b>Test cases [n]</b>             | 7766537     | 194584     | 95523       | 104203 | 28275 |
| <b>Deleterious test cases [n]</b> | 20461       | 67658      | 87415       | 204    | 231   |
| <b>NPV</b>                        | 0.999       | 0.966      | 0.975       | 0.999  | 0.995 |
| <b>PPV (precision)</b>            | 0.979       | 0.962      | 0.988       | 0.980  | 0.990 |
| <b>Sensitivity (recall)</b>       | 0.939       | 0.935      | 0.998       | 0.716  | 0.446 |
| <b>Specificity</b>                | 0.999       | 0.980      | 0.868       | 0.999  | 0.999 |
| <b>Balanced accuracy</b>          | 0.970       | 0.958      | 0.933       | 0.858  | 0.723 |

Presented is the predictive performance of MutationTaster2021 for the five different models. Results were obtained with test cases that were not used for training (NPV: negative predictive value, PPV: positive predictive value).

The actual performance of MutationTaster2021 is even better, as common polymorphisms and known disease mutations are automatically detected and categorised.

**Supplementary Table S3. Predictive performance of MutationTaster2**

|                             | without_aae   | simple_aae    | complex_aae   |
|-----------------------------|---------------|---------------|---------------|
| <b>NPV</b>                  | 0.957 [0.003] | 0.877 [0.008] | 0.869 [0.032] |
| <b>PPV (precision)</b>      | 0.888 [0.006] | 0.895 [0.005] | 0.944 [0.004] |
| <b>Sensitivity (recall)</b> | 0.954 [0.004] | 0.879 [0.007] | 0.879 [0.026] |
| <b>Specificity</b>          | 0.895 [0.005] | 0.893 [0.004] | 0.939 [0.005] |
| <b>Balanced accuracy</b>    | 0.922 [0.004] | 0.886 [0.004] | 0.907 [0.017] |

This table depicts the results of the cross-validation of the three different models of MutationTaster2 (standard deviation in brackets).

**Supplementary Table S4. Characteristics of the Random Forest models**

| Model                    | without_aae    | simple_aae     | complex_aae    | 3utr          | 5utr          |
|--------------------------|----------------|----------------|----------------|---------------|---------------|
| <b>Training [n]</b>      | 23299610       | 583752         | 286569         | 312608        | 84824         |
| <b>RF trees [n]</b>      | 100            | 100            | 200            | 100           | 300           |
| <b>Split criterion</b>   | entropy        | entropy        | gini           | gini          | entropy       |
| <b>AUC-ROC</b>           | 0.990 [<0.001] | 0.987 [<0.001] | 0.993 [<0.001] | 0.942 [0.015] | 0.893 [0.008] |
| <b>Balanced accuracy</b> | 0.959 [0.001]  | 0.940 [<0.001] | 0.907 [0.002]  | 0.826 [0.014] | 0.709 [0.007] |

These are characteristics of the different Random Forest (RF) models used in the five prediction models, determined in a grid search to find the best models (see **Random Forest model selection** in the Methods part below for a description). Area under the curve / receiver operating characteristics (AUC-ROC) and balanced accuracy were measured in a threefold cross-validation of the complete data set, standard deviation in brackets.

**Supplementary Table S5. External data sources used by MutationTaster2021**

| <b>Software</b>         | <b>Description</b>                             |
|-------------------------|------------------------------------------------|
| Ensembl(1)              | general genetic data                           |
| NCBI Entrez(2)          |                                                |
| dbSNP(2)                | dbSNP IDs of known variants                    |
| ClinVar(3)              | pathogenicity and disease reports for variants |
| HGMD public(4)          | position of public disease mutations from HGMD |
| 1000 Genomes Project(5) | genotype counts in in healthy controls         |
| ExAC(6)                 |                                                |
| gnomAD(7)               |                                                |
| PhastCons(8)            | phylogenetic conservation (DNA level)          |
| PhyloP(9)               |                                                |
| UniProt(10)             | protein domains                                |

**Supplementary Table S6. External software used by MutationTaster2021**

| <b>Software</b> | <b>Description</b>                |
|-----------------|-----------------------------------|
| blast2(11)      | conservation at protein level     |
| MaxEntScan(12)  | splice site prediction            |
| polyadq(13)     | test for poly-adenylation signals |

# SUPPLEMENTARY FIGURES

## Supplementary Figure S1. New landing page

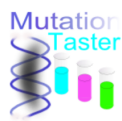

[Old interface](#)

[MutationTaster API](#)

[Other apps](#)

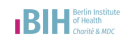

### mutation t@sting

[Chromosomal position](#)

**[Specific transcript](#)**

[VCF file](#)

Gene symbol

Gene symbol, Entrez ID or Ensembl ID

Transcript

Ensembl transcript ID

[Show available transcripts](#)

Variant by sequence snippet **A**

Enter a few bases around your alteration (e.g. ACTGTC[AG/T]GTGTF) **?**

Variant by position **B**

|        |                                                   |          |
|--------|---------------------------------------------------|----------|
| SNV:   | Position                                          | New base |
| Indel: | Position of last wild-type base before alteration |          |
|        | Position of first wild-type base after alteration |          |
|        | Inserted bases (optional)                         |          |

[Show sequence snippet](#)

Reference **A** **B**

- Coding sequence (c.)
- Transcript (cDNA)
- Gene (genetic sequence)

Analyse

Clear all input

[Show an example](#)

*This website is free and open to all users and there is no login requirement.*

This version: GRCh37, Ensembl 102

[Scientific articles](#)

[Documentation](#)

[Examples](#)

[Imprint](#)

Landing page of MutationTaster2021. The three different modes (analysis of a variant based on its physical position, analysis of a single variant based on a transcript/CDS position, and analysis of complete VCF files) are now shown in the same interface.

<https://www.genecascade.org/MutationTaster2021/>

## Supplementary Figure S2. MT2021 Results for a known disease mutation

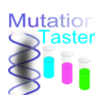

### mutation t@sting

Prediction: **Deleterious** [Permalink](#)

Summary:

- Amino acid sequence changed
- Known disease mutation at this position (HGMD CM081556)
- Known disease mutation: ClinVar ID 18371 (pathogenic)
- Protein features (might be) affected
- Model: simple\_aae
- Tree vote: 95|5 (del | benign) ?
- Automatic classification due to ClinVar

| Analysed issue                                    | Analysis result                                                                                                                                                                                                                                                                                                                                                                                                                                                                                                                                                                                                                                                                                                                                                                                                                                                                                                                                                                                                                                                                                                                                                                                                                                                                                                                                                                                                                                                                                                                                                                                                                       |                                     |                    |                          |         |           |       |          |                    |    |                          |         |               |  |    |                |             |               |                                    |    |                |           |               |                                     |    |                |        |               |                                    |    |                |           |               |                                    |    |                  |         |               |                                    |    |                 |           |              |  |     |  |        |               |                                    |    |                        |               |              |                                    |  |  |          |              |  |  |  |             |               |                                     |    |                         |
|---------------------------------------------------|---------------------------------------------------------------------------------------------------------------------------------------------------------------------------------------------------------------------------------------------------------------------------------------------------------------------------------------------------------------------------------------------------------------------------------------------------------------------------------------------------------------------------------------------------------------------------------------------------------------------------------------------------------------------------------------------------------------------------------------------------------------------------------------------------------------------------------------------------------------------------------------------------------------------------------------------------------------------------------------------------------------------------------------------------------------------------------------------------------------------------------------------------------------------------------------------------------------------------------------------------------------------------------------------------------------------------------------------------------------------------------------------------------------------------------------------------------------------------------------------------------------------------------------------------------------------------------------------------------------------------------------|-------------------------------------|--------------------|--------------------------|---------|-----------|-------|----------|--------------------|----|--------------------------|---------|---------------|--|----|----------------|-------------|---------------|------------------------------------|----|----------------|-----------|---------------|-------------------------------------|----|----------------|--------|---------------|------------------------------------|----|----------------|-----------|---------------|------------------------------------|----|------------------|---------|---------------|------------------------------------|----|-----------------|-----------|--------------|--|-----|--|--------|---------------|------------------------------------|----|------------------------|---------------|--------------|------------------------------------|--|--|----------|--------------|--|--|--|-------------|---------------|-------------------------------------|----|-------------------------|
| Phys. location                                    | chr2:233391374T>C <a href="#">show variant in all transcripts</a> <a href="#">IGV</a>                                                                                                                                                                                                                                                                                                                                                                                                                                                                                                                                                                                                                                                                                                                                                                                                                                                                                                                                                                                                                                                                                                                                                                                                                                                                                                                                                                                                                                                                                                                                                 |                                     |                    |                          |         |           |       |          |                    |    |                          |         |               |  |    |                |             |               |                                    |    |                |           |               |                                     |    |                |        |               |                                    |    |                |           |               |                                    |    |                  |         |               |                                    |    |                 |           |              |  |     |  |        |               |                                    |    |                        |               |              |                                    |  |  |          |              |  |  |  |             |               |                                     |    |                         |
| Gene symbol                                       | <b>CHRN</b>                                                                                                                                                                                                                                                                                                                                                                                                                                                                                                                                                                                                                                                                                                                                                                                                                                                                                                                                                                                                                                                                                                                                                                                                                                                                                                                                                                                                                                                                                                                                                                                                                           |                                     |                    |                          |         |           |       |          |                    |    |                          |         |               |  |    |                |             |               |                                    |    |                |           |               |                                     |    |                |        |               |                                    |    |                |           |               |                                    |    |                  |         |               |                                    |    |                 |           |              |  |     |  |        |               |                                    |    |                        |               |              |                                    |  |  |          |              |  |  |  |             |               |                                     |    |                         |
| ExAC LOF metrics                                  | LOF: 0.00, missense: 0.60, synonymous: 0.19                                                                                                                                                                                                                                                                                                                                                                                                                                                                                                                                                                                                                                                                                                                                                                                                                                                                                                                                                                                                                                                                                                                                                                                                                                                                                                                                                                                                                                                                                                                                                                                           |                                     |                    |                          |         |           |       |          |                    |    |                          |         |               |  |    |                |             |               |                                    |    |                |           |               |                                     |    |                |        |               |                                    |    |                |           |               |                                    |    |                  |         |               |                                    |    |                 |           |              |  |     |  |        |               |                                    |    |                        |               |              |                                    |  |  |          |              |  |  |  |             |               |                                     |    |                         |
| Ensembl transcript ID                             | <a href="#">ENST00000258385</a>                                                                                                                                                                                                                                                                                                                                                                                                                                                                                                                                                                                                                                                                                                                                                                                                                                                                                                                                                                                                                                                                                                                                                                                                                                                                                                                                                                                                                                                                                                                                                                                                       |                                     |                    |                          |         |           |       |          |                    |    |                          |         |               |  |    |                |             |               |                                    |    |                |           |               |                                     |    |                |        |               |                                    |    |                |           |               |                                    |    |                  |         |               |                                    |    |                 |           |              |  |     |  |        |               |                                    |    |                        |               |              |                                    |  |  |          |              |  |  |  |             |               |                                     |    |                         |
| Genbank transcript ID                             |                                                                                                                                                                                                                                                                                                                                                                                                                                                                                                                                                                                                                                                                                                                                                                                                                                                                                                                                                                                                                                                                                                                                                                                                                                                                                                                                                                                                                                                                                                                                                                                                                                       |                                     |                    |                          |         |           |       |          |                    |    |                          |         |               |  |    |                |             |               |                                    |    |                |           |               |                                     |    |                |        |               |                                    |    |                |           |               |                                    |    |                  |         |               |                                    |    |                 |           |              |  |     |  |        |               |                                    |    |                        |               |              |                                    |  |  |          |              |  |  |  |             |               |                                     |    |                         |
| UniProt peptide                                   | <a href="#">Q97001</a>                                                                                                                                                                                                                                                                                                                                                                                                                                                                                                                                                                                                                                                                                                                                                                                                                                                                                                                                                                                                                                                                                                                                                                                                                                                                                                                                                                                                                                                                                                                                                                                                                |                                     |                    |                          |         |           |       |          |                    |    |                          |         |               |  |    |                |             |               |                                    |    |                |           |               |                                     |    |                |        |               |                                    |    |                |           |               |                                    |    |                  |         |               |                                    |    |                 |           |              |  |     |  |        |               |                                    |    |                        |               |              |                                    |  |  |          |              |  |  |  |             |               |                                     |    |                         |
| Variant type                                      | Single base exchange                                                                                                                                                                                                                                                                                                                                                                                                                                                                                                                                                                                                                                                                                                                                                                                                                                                                                                                                                                                                                                                                                                                                                                                                                                                                                                                                                                                                                                                                                                                                                                                                                  |                                     |                    |                          |         |           |       |          |                    |    |                          |         |               |  |    |                |             |               |                                    |    |                |           |               |                                     |    |                |        |               |                                    |    |                |           |               |                                    |    |                  |         |               |                                    |    |                 |           |              |  |     |  |        |               |                                    |    |                        |               |              |                                    |  |  |          |              |  |  |  |             |               |                                     |    |                         |
| Gene region                                       | CDS                                                                                                                                                                                                                                                                                                                                                                                                                                                                                                                                                                                                                                                                                                                                                                                                                                                                                                                                                                                                                                                                                                                                                                                                                                                                                                                                                                                                                                                                                                                                                                                                                                   |                                     |                    |                          |         |           |       |          |                    |    |                          |         |               |  |    |                |             |               |                                    |    |                |           |               |                                     |    |                |        |               |                                    |    |                |           |               |                                    |    |                  |         |               |                                    |    |                 |           |              |  |     |  |        |               |                                    |    |                        |               |              |                                    |  |  |          |              |  |  |  |             |               |                                     |    |                         |
| DNA changes                                       | c.188T>C<br>g.672T>C                                                                                                                                                                                                                                                                                                                                                                                                                                                                                                                                                                                                                                                                                                                                                                                                                                                                                                                                                                                                                                                                                                                                                                                                                                                                                                                                                                                                                                                                                                                                                                                                                  |                                     |                    |                          |         |           |       |          |                    |    |                          |         |               |  |    |                |             |               |                                    |    |                |           |               |                                     |    |                |        |               |                                    |    |                |           |               |                                    |    |                  |         |               |                                    |    |                 |           |              |  |     |  |        |               |                                    |    |                        |               |              |                                    |  |  |          |              |  |  |  |             |               |                                     |    |                         |
| AA changes                                        | L63P Score: 98<br><a href="#">Explain score(s)</a>                                                                                                                                                                                                                                                                                                                                                                                                                                                                                                                                                                                                                                                                                                                                                                                                                                                                                                                                                                                                                                                                                                                                                                                                                                                                                                                                                                                                                                                                                                                                                                                    |                                     |                    |                          |         |           |       |          |                    |    |                          |         |               |  |    |                |             |               |                                    |    |                |           |               |                                     |    |                |        |               |                                    |    |                |           |               |                                    |    |                  |         |               |                                    |    |                 |           |              |  |     |  |        |               |                                    |    |                        |               |              |                                    |  |  |          |              |  |  |  |             |               |                                     |    |                         |
| Frameshift                                        | No                                                                                                                                                                                                                                                                                                                                                                                                                                                                                                                                                                                                                                                                                                                                                                                                                                                                                                                                                                                                                                                                                                                                                                                                                                                                                                                                                                                                                                                                                                                                                                                                                                    |                                     |                    |                          |         |           |       |          |                    |    |                          |         |               |  |    |                |             |               |                                    |    |                |           |               |                                     |    |                |        |               |                                    |    |                |           |               |                                    |    |                  |         |               |                                    |    |                 |           |              |  |     |  |        |               |                                    |    |                        |               |              |                                    |  |  |          |              |  |  |  |             |               |                                     |    |                         |
| Length of protein                                 | Normal                                                                                                                                                                                                                                                                                                                                                                                                                                                                                                                                                                                                                                                                                                                                                                                                                                                                                                                                                                                                                                                                                                                                                                                                                                                                                                                                                                                                                                                                                                                                                                                                                                |                                     |                    |                          |         |           |       |          |                    |    |                          |         |               |  |    |                |             |               |                                    |    |                |           |               |                                     |    |                |        |               |                                    |    |                |           |               |                                    |    |                  |         |               |                                    |    |                 |           |              |  |     |  |        |               |                                    |    |                        |               |              |                                    |  |  |          |              |  |  |  |             |               |                                     |    |                         |
| Known variant                                     | Allele 'C' was neither found in <a href="#">ExAC</a> , <a href="#">1000G</a> nor <a href="#">gnomAD</a> .<br><b>Known disease mutation: ClinVar variation ID 18371 (pathogenic for Congenital myasthenic syndrome 3B)</b><br><b>OMIM</b><br>Known disease mutation at this position, <a href="#">please check HGMD for details</a> (HGMD ID CM081556)                                                                                                                                                                                                                                                                                                                                                                                                                                                                                                                                                                                                                                                                                                                                                                                                                                                                                                                                                                                                                                                                                                                                                                                                                                                                                 |                                     |                    |                          |         |           |       |          |                    |    |                          |         |               |  |    |                |             |               |                                    |    |                |           |               |                                     |    |                |        |               |                                    |    |                |           |               |                                    |    |                  |         |               |                                    |    |                 |           |              |  |     |  |        |               |                                    |    |                        |               |              |                                    |  |  |          |              |  |  |  |             |               |                                     |    |                         |
| Phylogenetic conservation                         | <a href="#">PhylP</a> <a href="#">PhastCons</a><br>(flanking) 4.101 1<br>4.743 1<br>(flanking) 1.009 1<br><a href="#">Explain score(s)</a> and/or inspect your position(s) in <a href="#">UCSC Genome Browser</a>                                                                                                                                                                                                                                                                                                                                                                                                                                                                                                                                                                                                                                                                                                                                                                                                                                                                                                                                                                                                                                                                                                                                                                                                                                                                                                                                                                                                                     |                                     |                    |                          |         |           |       |          |                    |    |                          |         |               |  |    |                |             |               |                                    |    |                |           |               |                                     |    |                |        |               |                                    |    |                |           |               |                                    |    |                  |         |               |                                    |    |                 |           |              |  |     |  |        |               |                                    |    |                        |               |              |                                    |  |  |          |              |  |  |  |             |               |                                     |    |                         |
| Splice sites                                      | No abrogation of potential splice sites                                                                                                                                                                                                                                                                                                                                                                                                                                                                                                                                                                                                                                                                                                                                                                                                                                                                                                                                                                                                                                                                                                                                                                                                                                                                                                                                                                                                                                                                                                                                                                                               |                                     |                    |                          |         |           |       |          |                    |    |                          |         |               |  |    |                |             |               |                                    |    |                |           |               |                                     |    |                |        |               |                                    |    |                |           |               |                                    |    |                  |         |               |                                    |    |                 |           |              |  |     |  |        |               |                                    |    |                        |               |              |                                    |  |  |          |              |  |  |  |             |               |                                     |    |                         |
| Distance from splice site                         | 11                                                                                                                                                                                                                                                                                                                                                                                                                                                                                                                                                                                                                                                                                                                                                                                                                                                                                                                                                                                                                                                                                                                                                                                                                                                                                                                                                                                                                                                                                                                                                                                                                                    |                                     |                    |                          |         |           |       |          |                    |    |                          |         |               |  |    |                |             |               |                                    |    |                |           |               |                                     |    |                |        |               |                                    |    |                |           |               |                                    |    |                  |         |               |                                    |    |                 |           |              |  |     |  |        |               |                                    |    |                        |               |              |                                    |  |  |          |              |  |  |  |             |               |                                     |    |                         |
| Kozak consensus sequence altered?                 | No                                                                                                                                                                                                                                                                                                                                                                                                                                                                                                                                                                                                                                                                                                                                                                                                                                                                                                                                                                                                                                                                                                                                                                                                                                                                                                                                                                                                                                                                                                                                                                                                                                    |                                     |                    |                          |         |           |       |          |                    |    |                          |         |               |  |    |                |             |               |                                    |    |                |           |               |                                     |    |                |        |               |                                    |    |                |           |               |                                    |    |                  |         |               |                                    |    |                 |           |              |  |     |  |        |               |                                    |    |                        |               |              |                                    |  |  |          |              |  |  |  |             |               |                                     |    |                         |
| poly(A) signal                                    | N/A                                                                                                                                                                                                                                                                                                                                                                                                                                                                                                                                                                                                                                                                                                                                                                                                                                                                                                                                                                                                                                                                                                                                                                                                                                                                                                                                                                                                                                                                                                                                                                                                                                   |                                     |                    |                          |         |           |       |          |                    |    |                          |         |               |  |    |                |             |               |                                    |    |                |           |               |                                     |    |                |        |               |                                    |    |                |           |               |                                    |    |                  |         |               |                                    |    |                 |           |              |  |     |  |        |               |                                    |    |                        |               |              |                                    |  |  |          |              |  |  |  |             |               |                                     |    |                         |
| Protein conservation                              | <table border="1"> <thead> <tr> <th>Species</th> <th>Match</th> <th>Gene</th> <th>AA</th> <th>Alignment</th> </tr> </thead> <tbody> <tr> <td>Human</td> <td></td> <td></td> <td>63</td> <td>VDVALALTLNLSLSLKEVEETLTT</td> </tr> <tr> <td>mutated</td> <td>not conserved</td> <td></td> <td>63</td> <td>SNPISLKEVEETLT</td> </tr> <tr> <td>Ptrogodytes</td> <td>all identical</td> <td><a href="#">ENSPTRG00000013040</a></td> <td>63</td> <td>SNPISLKEVEETLT</td> </tr> <tr> <td>Mmullatta</td> <td>all identical</td> <td><a href="#">ENSMMLUC00000022147</a></td> <td>76</td> <td>SNPISLKEVEETLT</td> </tr> <tr> <td>Fcatus</td> <td>all identical</td> <td><a href="#">ENSCAG000000030943</a></td> <td>63</td> <td>SNPISLKEVEETLT</td> </tr> <tr> <td>Mmusculus</td> <td>all identical</td> <td><a href="#">ENSMUSG00000026251</a></td> <td>66</td> <td>LTLSPISLKEVEETLT</td> </tr> <tr> <td>Ggallus</td> <td>all identical</td> <td><a href="#">ENSGALG00000007899</a></td> <td>63</td> <td>VDVYLALTLSPISLK</td> </tr> <tr> <td>Trubripes</td> <td>no alignment</td> <td></td> <td>n/a</td> <td></td> </tr> <tr> <td>Dierio</td> <td>all identical</td> <td><a href="#">ENSTRUG00000026623</a></td> <td>63</td> <td>VDIYLALTLSPISLKEVDETLL</td> </tr> <tr> <td>Dmelanogaster</td> <td>no homologue</td> <td><a href="#">ENSDARG00000019342</a></td> <td></td> <td></td> </tr> <tr> <td>Celegans</td> <td>no homologue</td> <td></td> <td></td> <td></td> </tr> <tr> <td>Xtropicalis</td> <td>all identical</td> <td><a href="#">ENSXETG000000027884</a></td> <td>63</td> <td>VNVSALALTLSPISLKEADETLT</td> </tr> </tbody> </table> | Species                             | Match              | Gene                     | AA      | Alignment | Human |          |                    | 63 | VDVALALTLNLSLSLKEVEETLTT | mutated | not conserved |  | 63 | SNPISLKEVEETLT | Ptrogodytes | all identical | <a href="#">ENSPTRG00000013040</a> | 63 | SNPISLKEVEETLT | Mmullatta | all identical | <a href="#">ENSMMLUC00000022147</a> | 76 | SNPISLKEVEETLT | Fcatus | all identical | <a href="#">ENSCAG000000030943</a> | 63 | SNPISLKEVEETLT | Mmusculus | all identical | <a href="#">ENSMUSG00000026251</a> | 66 | LTLSPISLKEVEETLT | Ggallus | all identical | <a href="#">ENSGALG00000007899</a> | 63 | VDVYLALTLSPISLK | Trubripes | no alignment |  | n/a |  | Dierio | all identical | <a href="#">ENSTRUG00000026623</a> | 63 | VDIYLALTLSPISLKEVDETLL | Dmelanogaster | no homologue | <a href="#">ENSDARG00000019342</a> |  |  | Celegans | no homologue |  |  |  | Xtropicalis | all identical | <a href="#">ENSXETG000000027884</a> | 63 | VNVSALALTLSPISLKEADETLT |
| Species                                           | Match                                                                                                                                                                                                                                                                                                                                                                                                                                                                                                                                                                                                                                                                                                                                                                                                                                                                                                                                                                                                                                                                                                                                                                                                                                                                                                                                                                                                                                                                                                                                                                                                                                 | Gene                                | AA                 | Alignment                |         |           |       |          |                    |    |                          |         |               |  |    |                |             |               |                                    |    |                |           |               |                                     |    |                |        |               |                                    |    |                |           |               |                                    |    |                  |         |               |                                    |    |                 |           |              |  |     |  |        |               |                                    |    |                        |               |              |                                    |  |  |          |              |  |  |  |             |               |                                     |    |                         |
| Human                                             |                                                                                                                                                                                                                                                                                                                                                                                                                                                                                                                                                                                                                                                                                                                                                                                                                                                                                                                                                                                                                                                                                                                                                                                                                                                                                                                                                                                                                                                                                                                                                                                                                                       |                                     | 63                 | VDVALALTLNLSLSLKEVEETLTT |         |           |       |          |                    |    |                          |         |               |  |    |                |             |               |                                    |    |                |           |               |                                     |    |                |        |               |                                    |    |                |           |               |                                    |    |                  |         |               |                                    |    |                 |           |              |  |     |  |        |               |                                    |    |                        |               |              |                                    |  |  |          |              |  |  |  |             |               |                                     |    |                         |
| mutated                                           | not conserved                                                                                                                                                                                                                                                                                                                                                                                                                                                                                                                                                                                                                                                                                                                                                                                                                                                                                                                                                                                                                                                                                                                                                                                                                                                                                                                                                                                                                                                                                                                                                                                                                         |                                     | 63                 | SNPISLKEVEETLT           |         |           |       |          |                    |    |                          |         |               |  |    |                |             |               |                                    |    |                |           |               |                                     |    |                |        |               |                                    |    |                |           |               |                                    |    |                  |         |               |                                    |    |                 |           |              |  |     |  |        |               |                                    |    |                        |               |              |                                    |  |  |          |              |  |  |  |             |               |                                     |    |                         |
| Ptrogodytes                                       | all identical                                                                                                                                                                                                                                                                                                                                                                                                                                                                                                                                                                                                                                                                                                                                                                                                                                                                                                                                                                                                                                                                                                                                                                                                                                                                                                                                                                                                                                                                                                                                                                                                                         | <a href="#">ENSPTRG00000013040</a>  | 63                 | SNPISLKEVEETLT           |         |           |       |          |                    |    |                          |         |               |  |    |                |             |               |                                    |    |                |           |               |                                     |    |                |        |               |                                    |    |                |           |               |                                    |    |                  |         |               |                                    |    |                 |           |              |  |     |  |        |               |                                    |    |                        |               |              |                                    |  |  |          |              |  |  |  |             |               |                                     |    |                         |
| Mmullatta                                         | all identical                                                                                                                                                                                                                                                                                                                                                                                                                                                                                                                                                                                                                                                                                                                                                                                                                                                                                                                                                                                                                                                                                                                                                                                                                                                                                                                                                                                                                                                                                                                                                                                                                         | <a href="#">ENSMMLUC00000022147</a> | 76                 | SNPISLKEVEETLT           |         |           |       |          |                    |    |                          |         |               |  |    |                |             |               |                                    |    |                |           |               |                                     |    |                |        |               |                                    |    |                |           |               |                                    |    |                  |         |               |                                    |    |                 |           |              |  |     |  |        |               |                                    |    |                        |               |              |                                    |  |  |          |              |  |  |  |             |               |                                     |    |                         |
| Fcatus                                            | all identical                                                                                                                                                                                                                                                                                                                                                                                                                                                                                                                                                                                                                                                                                                                                                                                                                                                                                                                                                                                                                                                                                                                                                                                                                                                                                                                                                                                                                                                                                                                                                                                                                         | <a href="#">ENSCAG000000030943</a>  | 63                 | SNPISLKEVEETLT           |         |           |       |          |                    |    |                          |         |               |  |    |                |             |               |                                    |    |                |           |               |                                     |    |                |        |               |                                    |    |                |           |               |                                    |    |                  |         |               |                                    |    |                 |           |              |  |     |  |        |               |                                    |    |                        |               |              |                                    |  |  |          |              |  |  |  |             |               |                                     |    |                         |
| Mmusculus                                         | all identical                                                                                                                                                                                                                                                                                                                                                                                                                                                                                                                                                                                                                                                                                                                                                                                                                                                                                                                                                                                                                                                                                                                                                                                                                                                                                                                                                                                                                                                                                                                                                                                                                         | <a href="#">ENSMUSG00000026251</a>  | 66                 | LTLSPISLKEVEETLT         |         |           |       |          |                    |    |                          |         |               |  |    |                |             |               |                                    |    |                |           |               |                                     |    |                |        |               |                                    |    |                |           |               |                                    |    |                  |         |               |                                    |    |                 |           |              |  |     |  |        |               |                                    |    |                        |               |              |                                    |  |  |          |              |  |  |  |             |               |                                     |    |                         |
| Ggallus                                           | all identical                                                                                                                                                                                                                                                                                                                                                                                                                                                                                                                                                                                                                                                                                                                                                                                                                                                                                                                                                                                                                                                                                                                                                                                                                                                                                                                                                                                                                                                                                                                                                                                                                         | <a href="#">ENSGALG00000007899</a>  | 63                 | VDVYLALTLSPISLK          |         |           |       |          |                    |    |                          |         |               |  |    |                |             |               |                                    |    |                |           |               |                                     |    |                |        |               |                                    |    |                |           |               |                                    |    |                  |         |               |                                    |    |                 |           |              |  |     |  |        |               |                                    |    |                        |               |              |                                    |  |  |          |              |  |  |  |             |               |                                     |    |                         |
| Trubripes                                         | no alignment                                                                                                                                                                                                                                                                                                                                                                                                                                                                                                                                                                                                                                                                                                                                                                                                                                                                                                                                                                                                                                                                                                                                                                                                                                                                                                                                                                                                                                                                                                                                                                                                                          |                                     | n/a                |                          |         |           |       |          |                    |    |                          |         |               |  |    |                |             |               |                                    |    |                |           |               |                                     |    |                |        |               |                                    |    |                |           |               |                                    |    |                  |         |               |                                    |    |                 |           |              |  |     |  |        |               |                                    |    |                        |               |              |                                    |  |  |          |              |  |  |  |             |               |                                     |    |                         |
| Dierio                                            | all identical                                                                                                                                                                                                                                                                                                                                                                                                                                                                                                                                                                                                                                                                                                                                                                                                                                                                                                                                                                                                                                                                                                                                                                                                                                                                                                                                                                                                                                                                                                                                                                                                                         | <a href="#">ENSTRUG00000026623</a>  | 63                 | VDIYLALTLSPISLKEVDETLL   |         |           |       |          |                    |    |                          |         |               |  |    |                |             |               |                                    |    |                |           |               |                                     |    |                |        |               |                                    |    |                |           |               |                                    |    |                  |         |               |                                    |    |                 |           |              |  |     |  |        |               |                                    |    |                        |               |              |                                    |  |  |          |              |  |  |  |             |               |                                     |    |                         |
| Dmelanogaster                                     | no homologue                                                                                                                                                                                                                                                                                                                                                                                                                                                                                                                                                                                                                                                                                                                                                                                                                                                                                                                                                                                                                                                                                                                                                                                                                                                                                                                                                                                                                                                                                                                                                                                                                          | <a href="#">ENSDARG00000019342</a>  |                    |                          |         |           |       |          |                    |    |                          |         |               |  |    |                |             |               |                                    |    |                |           |               |                                     |    |                |        |               |                                    |    |                |           |               |                                    |    |                  |         |               |                                    |    |                 |           |              |  |     |  |        |               |                                    |    |                        |               |              |                                    |  |  |          |              |  |  |  |             |               |                                     |    |                         |
| Celegans                                          | no homologue                                                                                                                                                                                                                                                                                                                                                                                                                                                                                                                                                                                                                                                                                                                                                                                                                                                                                                                                                                                                                                                                                                                                                                                                                                                                                                                                                                                                                                                                                                                                                                                                                          |                                     |                    |                          |         |           |       |          |                    |    |                          |         |               |  |    |                |             |               |                                    |    |                |           |               |                                     |    |                |        |               |                                    |    |                |           |               |                                    |    |                  |         |               |                                    |    |                 |           |              |  |     |  |        |               |                                    |    |                        |               |              |                                    |  |  |          |              |  |  |  |             |               |                                     |    |                         |
| Xtropicalis                                       | all identical                                                                                                                                                                                                                                                                                                                                                                                                                                                                                                                                                                                                                                                                                                                                                                                                                                                                                                                                                                                                                                                                                                                                                                                                                                                                                                                                                                                                                                                                                                                                                                                                                         | <a href="#">ENSXETG000000027884</a> | 63                 | VNVSALALTLSPISLKEADETLT  |         |           |       |          |                    |    |                          |         |               |  |    |                |             |               |                                    |    |                |           |               |                                     |    |                |        |               |                                    |    |                |           |               |                                    |    |                  |         |               |                                    |    |                 |           |              |  |     |  |        |               |                                    |    |                        |               |              |                                    |  |  |          |              |  |  |  |             |               |                                     |    |                         |
| Protein features                                  | <table border="1"> <thead> <tr> <th>Start (aa)</th> <th>End (aa)</th> <th>Feature</th> <th>Details</th> </tr> </thead> <tbody> <tr> <td>22</td> <td>245</td> <td>TOPO_DOM</td> <td>Extracellular lost</td> </tr> </tbody> </table>                                                                                                                                                                                                                                                                                                                                                                                                                                                                                                                                                                                                                                                                                                                                                                                                                                                                                                                                                                                                                                                                                                                                                                                                                                                                                                                                                                                                    | Start (aa)                          | End (aa)           | Feature                  | Details | 22        | 245   | TOPO_DOM | Extracellular lost |    |                          |         |               |  |    |                |             |               |                                    |    |                |           |               |                                     |    |                |        |               |                                    |    |                |           |               |                                    |    |                  |         |               |                                    |    |                 |           |              |  |     |  |        |               |                                    |    |                        |               |              |                                    |  |  |          |              |  |  |  |             |               |                                     |    |                         |
| Start (aa)                                        | End (aa)                                                                                                                                                                                                                                                                                                                                                                                                                                                                                                                                                                                                                                                                                                                                                                                                                                                                                                                                                                                                                                                                                                                                                                                                                                                                                                                                                                                                                                                                                                                                                                                                                              | Feature                             | Details            |                          |         |           |       |          |                    |    |                          |         |               |  |    |                |             |               |                                    |    |                |           |               |                                     |    |                |        |               |                                    |    |                |           |               |                                    |    |                  |         |               |                                    |    |                 |           |              |  |     |  |        |               |                                    |    |                        |               |              |                                    |  |  |          |              |  |  |  |             |               |                                     |    |                         |
| 22                                                | 245                                                                                                                                                                                                                                                                                                                                                                                                                                                                                                                                                                                                                                                                                                                                                                                                                                                                                                                                                                                                                                                                                                                                                                                                                                                                                                                                                                                                                                                                                                                                                                                                                                   | TOPO_DOM                            | Extracellular lost |                          |         |           |       |          |                    |    |                          |         |               |  |    |                |             |               |                                    |    |                |           |               |                                     |    |                |        |               |                                    |    |                |           |               |                                    |    |                  |         |               |                                    |    |                 |           |              |  |     |  |        |               |                                    |    |                        |               |              |                                    |  |  |          |              |  |  |  |             |               |                                     |    |                         |
| AA sequence altered                               | Yes                                                                                                                                                                                                                                                                                                                                                                                                                                                                                                                                                                                                                                                                                                                                                                                                                                                                                                                                                                                                                                                                                                                                                                                                                                                                                                                                                                                                                                                                                                                                                                                                                                   |                                     |                    |                          |         |           |       |          |                    |    |                          |         |               |  |    |                |             |               |                                    |    |                |           |               |                                     |    |                |        |               |                                    |    |                |           |               |                                    |    |                  |         |               |                                    |    |                 |           |              |  |     |  |        |               |                                    |    |                        |               |              |                                    |  |  |          |              |  |  |  |             |               |                                     |    |                         |
| Chromosome                                        | 2                                                                                                                                                                                                                                                                                                                                                                                                                                                                                                                                                                                                                                                                                                                                                                                                                                                                                                                                                                                                                                                                                                                                                                                                                                                                                                                                                                                                                                                                                                                                                                                                                                     |                                     |                    |                          |         |           |       |          |                    |    |                          |         |               |  |    |                |             |               |                                    |    |                |           |               |                                     |    |                |        |               |                                    |    |                |           |               |                                    |    |                  |         |               |                                    |    |                 |           |              |  |     |  |        |               |                                    |    |                        |               |              |                                    |  |  |          |              |  |  |  |             |               |                                     |    |                         |
| Strand                                            | 1                                                                                                                                                                                                                                                                                                                                                                                                                                                                                                                                                                                                                                                                                                                                                                                                                                                                                                                                                                                                                                                                                                                                                                                                                                                                                                                                                                                                                                                                                                                                                                                                                                     |                                     |                    |                          |         |           |       |          |                    |    |                          |         |               |  |    |                |             |               |                                    |    |                |           |               |                                     |    |                |        |               |                                    |    |                |           |               |                                    |    |                  |         |               |                                    |    |                 |           |              |  |     |  |        |               |                                    |    |                        |               |              |                                    |  |  |          |              |  |  |  |             |               |                                     |    |                         |
| Original gDNA sequence snippet                    | GGCCCTCACACTCTCAACCTCATCTCCTGGTGAAGGCC                                                                                                                                                                                                                                                                                                                                                                                                                                                                                                                                                                                                                                                                                                                                                                                                                                                                                                                                                                                                                                                                                                                                                                                                                                                                                                                                                                                                                                                                                                                                                                                                |                                     |                    |                          |         |           |       |          |                    |    |                          |         |               |  |    |                |             |               |                                    |    |                |           |               |                                     |    |                |        |               |                                    |    |                |           |               |                                    |    |                  |         |               |                                    |    |                 |           |              |  |     |  |        |               |                                    |    |                        |               |              |                                    |  |  |          |              |  |  |  |             |               |                                     |    |                         |
| Altered gDNA sequence snippet                     | GGCCCTCACACTCTCAACCTCATCTCCTGGTGAAGGCC                                                                                                                                                                                                                                                                                                                                                                                                                                                                                                                                                                                                                                                                                                                                                                                                                                                                                                                                                                                                                                                                                                                                                                                                                                                                                                                                                                                                                                                                                                                                                                                                |                                     |                    |                          |         |           |       |          |                    |    |                          |         |               |  |    |                |             |               |                                    |    |                |           |               |                                     |    |                |        |               |                                    |    |                |           |               |                                    |    |                  |         |               |                                    |    |                 |           |              |  |     |  |        |               |                                    |    |                        |               |              |                                    |  |  |          |              |  |  |  |             |               |                                     |    |                         |
| Original cDNA sequence snippet                    | GGCCCTCACACTCTCAACCTCATCTCCTGAAAGAAGTTG                                                                                                                                                                                                                                                                                                                                                                                                                                                                                                                                                                                                                                                                                                                                                                                                                                                                                                                                                                                                                                                                                                                                                                                                                                                                                                                                                                                                                                                                                                                                                                                               |                                     |                    |                          |         |           |       |          |                    |    |                          |         |               |  |    |                |             |               |                                    |    |                |           |               |                                     |    |                |        |               |                                    |    |                |           |               |                                    |    |                  |         |               |                                    |    |                 |           |              |  |     |  |        |               |                                    |    |                        |               |              |                                    |  |  |          |              |  |  |  |             |               |                                     |    |                         |
| Altered cDNA sequence snippet                     | GGCCCTCACACTCTCAACCTCATCTCCTGAAAGAAGTTG                                                                                                                                                                                                                                                                                                                                                                                                                                                                                                                                                                                                                                                                                                                                                                                                                                                                                                                                                                                                                                                                                                                                                                                                                                                                                                                                                                                                                                                                                                                                                                                               |                                     |                    |                          |         |           |       |          |                    |    |                          |         |               |  |    |                |             |               |                                    |    |                |           |               |                                     |    |                |        |               |                                    |    |                |           |               |                                    |    |                  |         |               |                                    |    |                 |           |              |  |     |  |        |               |                                    |    |                        |               |              |                                    |  |  |          |              |  |  |  |             |               |                                     |    |                         |
| Wildtype AA sequence                              | MEGPVLTGL LAALAVGSGW GLNEEERLIR HLFQEKYGNK ELRPVAKKEE SVDVALALTL<br>SNLSLSLKEVE ETLTNNWIE HGWTDNRLKW NAEFGNISV LRLPPDMWL PEIVLENNND<br>GSFQISYCN VLVYHYGFVY WLPPIAFRSS CPISVTFYFP DWQNCSLKFS SLKYTAKEIT<br>LSLKQDAKEN RTYPVEWIII DPEGFTENGE WEIVHRPARV NVDPRAPLDS PSRDITFYL<br>IIRRKPLFYI INILVPCVLI SPMWLVLYL PADSGEKTSV AISVLLAQS FLLLSKRLP<br>ATSMALPLIG KFLFGWLV TMVVVICVIV LNIHFRTPST HVLSGQVKL FLETPELLH<br>MSRPAEDGGS PGALVRRSS LGYISKAEEY FLLKRSOLM FEKOSERHGL ARLLTARRP<br>PASSEQAQGE LFNELKPAVD GANFVNHMR DONNYNEEKD SMNRVARTVD RLCLFVITPV<br>MVVGTAWIFL QGVYQPPPI PFGDPYSYN VQDKRFI*                                                                                                                                                                                                                                                                                                                                                                                                                                                                                                                                                                                                                                                                                                                                                                                                                                                                                                                                                                                                                                       |                                     |                    |                          |         |           |       |          |                    |    |                          |         |               |  |    |                |             |               |                                    |    |                |           |               |                                     |    |                |        |               |                                    |    |                |           |               |                                    |    |                  |         |               |                                    |    |                 |           |              |  |     |  |        |               |                                    |    |                        |               |              |                                    |  |  |          |              |  |  |  |             |               |                                     |    |                         |
| Mutated AA sequence                               | MEGPVLTGL LAALAVGSGW GLNEEERLIR HLFQEKYGNK ELRPVAKKEE SVDVALALTL<br>SNPISLKEVE ETLTNNWIE HGWTDNRLKW NAEFGNISV LRLPPDMWL PEIVLENNND<br>GSFQISYCN VLVYHYGFVY WLPPIAFRSS CPISVTFYFP DWQNCSLKFS SLKYTAKEIT<br>LSLKQDAKEN RTYPVEWIII DPEGFTENGE WEIVHRPARV NVDPRAPLDS PSRDITFYL<br>IIRRKPLFYI INILVPCVLI SPMWLVLYL PADSGEKTSV AISVLLAQS FLLLSKRLP<br>ATSMALPLIG KFLFGWLV TMVVVICVIV LNIHFRTPST HVLSGQVKL FLETPELLH<br>MSRPAEDGGS PGALVRRSS LGYISKAEEY FLLKRSOLM FEKOSERHGL ARLLTARRP<br>PASSEQAQGE LFNELKPAVD GANFVNHMR DONNYNEEKD SMNRVARTVD RLCLFVITPV<br>MVVGTAWIFL QGVYQPPPI PFGDPYSYN VQDKRFI*                                                                                                                                                                                                                                                                                                                                                                                                                                                                                                                                                                                                                                                                                                                                                                                                                                                                                                                                                                                                                                        |                                     |                    |                          |         |           |       |          |                    |    |                          |         |               |  |    |                |             |               |                                    |    |                |           |               |                                     |    |                |        |               |                                    |    |                |           |               |                                    |    |                  |         |               |                                    |    |                 |           |              |  |     |  |        |               |                                    |    |                        |               |              |                                    |  |  |          |              |  |  |  |             |               |                                     |    |                         |
| Position of stopcodon in wt / mu CDS              | 1554 / 1554                                                                                                                                                                                                                                                                                                                                                                                                                                                                                                                                                                                                                                                                                                                                                                                                                                                                                                                                                                                                                                                                                                                                                                                                                                                                                                                                                                                                                                                                                                                                                                                                                           |                                     |                    |                          |         |           |       |          |                    |    |                          |         |               |  |    |                |             |               |                                    |    |                |           |               |                                     |    |                |        |               |                                    |    |                |           |               |                                    |    |                  |         |               |                                    |    |                 |           |              |  |     |  |        |               |                                    |    |                        |               |              |                                    |  |  |          |              |  |  |  |             |               |                                     |    |                         |
| Position (AA) of stopcodon in wt / mu AA sequence | 518 / 518                                                                                                                                                                                                                                                                                                                                                                                                                                                                                                                                                                                                                                                                                                                                                                                                                                                                                                                                                                                                                                                                                                                                                                                                                                                                                                                                                                                                                                                                                                                                                                                                                             |                                     |                    |                          |         |           |       |          |                    |    |                          |         |               |  |    |                |             |               |                                    |    |                |           |               |                                     |    |                |        |               |                                    |    |                |           |               |                                    |    |                  |         |               |                                    |    |                 |           |              |  |     |  |        |               |                                    |    |                        |               |              |                                    |  |  |          |              |  |  |  |             |               |                                     |    |                         |
| Position of stopcodon in wt / mu cDNA             | 1586 / 1586                                                                                                                                                                                                                                                                                                                                                                                                                                                                                                                                                                                                                                                                                                                                                                                                                                                                                                                                                                                                                                                                                                                                                                                                                                                                                                                                                                                                                                                                                                                                                                                                                           |                                     |                    |                          |         |           |       |          |                    |    |                          |         |               |  |    |                |             |               |                                    |    |                |           |               |                                     |    |                |        |               |                                    |    |                |           |               |                                    |    |                  |         |               |                                    |    |                 |           |              |  |     |  |        |               |                                    |    |                        |               |              |                                    |  |  |          |              |  |  |  |             |               |                                     |    |                         |
| Position of start ATG in wt / mu cDNA             | 33 / 33                                                                                                                                                                                                                                                                                                                                                                                                                                                                                                                                                                                                                                                                                                                                                                                                                                                                                                                                                                                                                                                                                                                                                                                                                                                                                                                                                                                                                                                                                                                                                                                                                               |                                     |                    |                          |         |           |       |          |                    |    |                          |         |               |  |    |                |             |               |                                    |    |                |           |               |                                     |    |                |        |               |                                    |    |                |           |               |                                    |    |                  |         |               |                                    |    |                 |           |              |  |     |  |        |               |                                    |    |                        |               |              |                                    |  |  |          |              |  |  |  |             |               |                                     |    |                         |
| Last intron/exon boundary                         | 1403                                                                                                                                                                                                                                                                                                                                                                                                                                                                                                                                                                                                                                                                                                                                                                                                                                                                                                                                                                                                                                                                                                                                                                                                                                                                                                                                                                                                                                                                                                                                                                                                                                  |                                     |                    |                          |         |           |       |          |                    |    |                          |         |               |  |    |                |             |               |                                    |    |                |           |               |                                     |    |                |        |               |                                    |    |                |           |               |                                    |    |                  |         |               |                                    |    |                 |           |              |  |     |  |        |               |                                    |    |                        |               |              |                                    |  |  |          |              |  |  |  |             |               |                                     |    |                         |
| Theoretical NMD boundary in CDS                   | 1320                                                                                                                                                                                                                                                                                                                                                                                                                                                                                                                                                                                                                                                                                                                                                                                                                                                                                                                                                                                                                                                                                                                                                                                                                                                                                                                                                                                                                                                                                                                                                                                                                                  |                                     |                    |                          |         |           |       |          |                    |    |                          |         |               |  |    |                |             |               |                                    |    |                |           |               |                                     |    |                |        |               |                                    |    |                |           |               |                                    |    |                  |         |               |                                    |    |                 |           |              |  |     |  |        |               |                                    |    |                        |               |              |                                    |  |  |          |              |  |  |  |             |               |                                     |    |                         |
| Length of CDS                                     | 1554                                                                                                                                                                                                                                                                                                                                                                                                                                                                                                                                                                                                                                                                                                                                                                                                                                                                                                                                                                                                                                                                                                                                                                                                                                                                                                                                                                                                                                                                                                                                                                                                                                  |                                     |                    |                          |         |           |       |          |                    |    |                          |         |               |  |    |                |             |               |                                    |    |                |           |               |                                     |    |                |        |               |                                    |    |                |           |               |                                    |    |                  |         |               |                                    |    |                 |           |              |  |     |  |        |               |                                    |    |                        |               |              |                                    |  |  |          |              |  |  |  |             |               |                                     |    |                         |
| Coding sequence (CDS) position                    | 188                                                                                                                                                                                                                                                                                                                                                                                                                                                                                                                                                                                                                                                                                                                                                                                                                                                                                                                                                                                                                                                                                                                                                                                                                                                                                                                                                                                                                                                                                                                                                                                                                                   |                                     |                    |                          |         |           |       |          |                    |    |                          |         |               |  |    |                |             |               |                                    |    |                |           |               |                                     |    |                |        |               |                                    |    |                |           |               |                                    |    |                  |         |               |                                    |    |                 |           |              |  |     |  |        |               |                                    |    |                        |               |              |                                    |  |  |          |              |  |  |  |             |               |                                     |    |                         |
| cDNA position                                     | 220                                                                                                                                                                                                                                                                                                                                                                                                                                                                                                                                                                                                                                                                                                                                                                                                                                                                                                                                                                                                                                                                                                                                                                                                                                                                                                                                                                                                                                                                                                                                                                                                                                   |                                     |                    |                          |         |           |       |          |                    |    |                          |         |               |  |    |                |             |               |                                    |    |                |           |               |                                     |    |                |        |               |                                    |    |                |           |               |                                    |    |                  |         |               |                                    |    |                 |           |              |  |     |  |        |               |                                    |    |                        |               |              |                                    |  |  |          |              |  |  |  |             |               |                                     |    |                         |
| gDNA position                                     | 672                                                                                                                                                                                                                                                                                                                                                                                                                                                                                                                                                                                                                                                                                                                                                                                                                                                                                                                                                                                                                                                                                                                                                                                                                                                                                                                                                                                                                                                                                                                                                                                                                                   |                                     |                    |                          |         |           |       |          |                    |    |                          |         |               |  |    |                |             |               |                                    |    |                |           |               |                                     |    |                |        |               |                                    |    |                |           |               |                                    |    |                  |         |               |                                    |    |                 |           |              |  |     |  |        |               |                                    |    |                        |               |              |                                    |  |  |          |              |  |  |  |             |               |                                     |    |                         |
| Chromosomal position                              | 233391374                                                                                                                                                                                                                                                                                                                                                                                                                                                                                                                                                                                                                                                                                                                                                                                                                                                                                                                                                                                                                                                                                                                                                                                                                                                                                                                                                                                                                                                                                                                                                                                                                             |                                     |                    |                          |         |           |       |          |                    |    |                          |         |               |  |    |                |             |               |                                    |    |                |           |               |                                     |    |                |        |               |                                    |    |                |           |               |                                    |    |                  |         |               |                                    |    |                 |           |              |  |     |  |        |               |                                    |    |                        |               |              |                                    |  |  |          |              |  |  |  |             |               |                                     |    |                         |
| Speed                                             | 0.16 s                                                                                                                                                                                                                                                                                                                                                                                                                                                                                                                                                                                                                                                                                                                                                                                                                                                                                                                                                                                                                                                                                                                                                                                                                                                                                                                                                                                                                                                                                                                                                                                                                                |                                     |                    |                          |         |           |       |          |                    |    |                          |         |               |  |    |                |             |               |                                    |    |                |           |               |                                     |    |                |        |               |                                    |    |                |           |               |                                    |    |                  |         |               |                                    |    |                 |           |              |  |     |  |        |               |                                    |    |                        |               |              |                                    |  |  |          |              |  |  |  |             |               |                                     |    |                         |

All positions are in basepairs (bp) if not explicitly stated differently. cDNA/gDNA/chromosomal position: Insidel are shown as 'last normal base / first normal base'.  
AA/aa: amino acid; CDS: coding sequence; mu: mutated; NMD: nonsense-mediated mRNA decay; nt: nucleotide; wt: wildtype; TGP: 1000 Genomes Project

The SNV chr2:233391374T>C (GRCh37) in the *CHRN* gene is listed in NCBI ClinVar as a known disease-causing variant for *Myasthenic syndrome*.

## METHODS

### Selection of variants

Benign variants were selected from the gnomAD genotype repository (version 2.1.1). We considered all intragenic variants found in at least one individual in the homozygous state as benign. Variants without any allele frequency specifications were discarded.

We obtained deleterious intragenic variants from ClinVar (version 2020-12-08) and HGMD Pro (Version 2020Q03). ClinVar variants were included when they were annotated as 'pathogenic' or as 'likely pathogenic'; variants with other or conflicting labels were excluded. HGMD variants were used when they were labelled as 'DM' (disease mutation).

Variants found in both training sets were removed. The training data comprise single nucleotide variants as well as small insertions/deletions.

### Selection of training cases

All variants were sent to MutationTaster. The results of MutationTaster's analyses were saved in dedicated database tables. These results comprised information such as outcome (deleterious vs. benign), affected transcripts, pre-mRNA localisation of the variant, conservation at the protein and DNA level and many more (see **Supplementary Table S5** for the data sources and **Supplementary Table S6** for the external software). A complete list of the features can be found at <https://www.genecascade.org/downloads/MutationTaster2021/SupplementaryData/>.

Depending on effect and pre-mRNA localisation of the variant within a transcript, the variant:transcript pair was assigned to the suitable model (see **Supplementary Table S1**).

### Data pre-processing for the classification

The steps listed below were used to train the classifier but are also used for the classification of variants within MutationTaster2021.

### Changes in the amino acid sequence

A variant can cause one (*simple\_aae* model) or more (*complex\_aae*) changes to the amino acid sequence. In the Random Forest models, each observed amino acid substitution in the whole training data set (including insertions, deletions, or nonsense variants, e.g. 'AP', '-A', 'A-' or 'A\*') is treated as a single feature. In the *simple\_aae* model, only one of these features can be true for a single variant; in the *complex\_aae* model many features can be true.

### phyloP / phastCons

We use the phyloP and phastCons values to reflect the phylogenetic conservation of a variant. In addition to the position at the variant site(s) itself, we assess the conservation at both flanking bases. Whilst the latter always contains two values per variant and metric (phyloP and phastCons), the variant sites may have multiple values in case of deletions of more than a single base.

After trying different models, we determined that using four different attributes (mean phyloP score of flanking bases, mean phastCons score of flanking bases, mean phyloP score of affected bases, mean phastCons score of affected bases) yielded the highest accuracy.

## Protein features

Each variant can hit one or more functional domains in the protein. Our training data includes a column for each feature that could be lost due to the mutation (e.g. DISULFID). The entries in these columns are binary and specify whether the feature has been lost at least once for each variant.

## Splicing

We prepared two features to handle the effect of a variant on splicing, "splice\_quot\_A" and "splice\_quot\_D". These scores are calculated as the absolute ratio of the absolute difference between the wild-type score and the mutation score (mt) with the wild-type score (wt) for the acceptor and donor site, respectively, e.g. for a donor site:

$$\text{splice\_quot\_D} = \frac{\text{abs}(\text{abs}(\text{mt\_D} - \text{wt\_D}))}{\text{wt\_D}}$$

If the first/last base of an exon or the first/last two intronic bases are changed, we consider a splice site as lost and set the splice\_quot to 10. If there is no effect of a variant on a nearby splice site, then the score is set to 0 instead.

It should be noted that MutationTaster2021 does not search for activated cryptic splice sites but only predicts the effect on known splice sites..

## Dichotomisation

All other categorical (non-numeric or non-binary) attributes in the data were dichotomised to obtain features with a binary value (true/false).

## Random Forest models

### Feature removal

For each model, we separately checked the training data and removed columns and entries with no information. First, we removed all columns that did not contain any entries for any of the variants for that model. We then removed the columns with identical values for all variants.

In addition to the feature removal, we also removed training cases containing at least one column without any value.

### Model generation and selection

We used the Python sklearn package to generate Random Forest models. We decided to train our models for the highest balanced accuracy as a trade-off between specificity (low false positive rate) and sensitivity (correct identification of disease-causing variants).

We started with the default parameters and performed a grid search for each of the five models to find the optimal hyperparameters for the number of trees used in each Random Forest and the criteria to find the optimal split for each of the nodes within each tree (either gini index or entropy), which are measures of impurity or information gain of a node in the tree. A detailed list of the combinations tested and the description of the Random Forest development are provided at

<https://www.genecascade.org/downloads/MutationTaster2021/SupplementaryData/>.

To avoid overfitting, we performed 3-fold cross-validations for each of our five models to select the best parameters for the number of trees in the Random Forest and the best criterion for determining the optimal split at each node. For this purpose, we randomly extracted 25% of our training data to withhold for the final performance test, while ensuring that the extracted samples followed the same distribution of positive and negative samples as present in the entire dataset. We trained the classifier on the remaining variants. The models were trained within a grid search, with possible hyperparameters set so that the number of trees within the Random Forest was either 100, 200, or 300 and the criterion for splits could be either the gini index or entropy. Three validation cycles were performed for each model (see **Supplementary Table S4** for the characteristics of the chosen models).

We additionally decided to not only select for models with a high predictive performance, but also for run-time performance, i.e. for small models. Therefore, we opted to pick the models with only 100 trees for *simple\_aae* and *without\_aae*. This decision resulted in a marginal decrease of balanced accuracy of 0.12% (*simple\_aae*) and 0.05% (*without\_aae*) compared to the 'perfect models', whilst leading to a size reduction of 67.1% (*simple\_aae*) and 68.0% (*without\_aae*), giving us an equivalent boost in classification speed. Final performance was then calculated on the test data set (see **Supplementary Table S2**). The classification uses the weighted prediction of the result leaf of each Random Forest tree, i.e. the fraction of deleterious cases vs. all cases for leaves predicting deleteriousness. Please note that most leaves give a binary result (i.e. all cases left are either benign or deleterious). The trees are available on our website.

We were thus able to improve the accuracy in all classification models, with a drastic increase in the *simple\_aae* model (MutationTaster2 88.6%, MutationTaster2021 95.8%) and substantial changes in the *without\_aae* model from 92.2% to 97.0% and in the *complex\_aae* model from 90.7% to 93.3% (see **Supplementary Table S3** for MutationTaster2's performance).

## IMPLEMENTATION

Data are stored in a PostgreSQL database. MutationTaster2021 is programmed in Perl and runs under `mod_perl` in an Apache web server. All user interfaces are written in HTML (with JavaScript and AJAX functions) and are developed for the Firefox browser under Linux, Mac OS, and Microsoft Windows and are regularly tested with Google Chrome, Safari and Microsoft Edge. We employ TORQUE (version 4.2) as job scheduling software. External tools used by MutationTaster2021 (MaxEntScan(12), bl2seq(11), polyadq(13)) run on a RAM disk to increase speed.

The Random Forests were trained in Python 3.6.12 using scikit-learn 0.23.2 and numpy 1.17.3, data preprocessing was done using pandas 1.1.5. Plots (downloadable from our website) were created using matplotlib 3.2.2. We used a Perl script to transform the Random Forest models into Perl data structures which can be accessed by the MutationTaster2021 software.



## REFERENCES

1. Howe, K.L., Achuthan, P., Allen, J., Allen, J., Alvarez-Jarreta, J., Amode, M.R., Armean, I.M., Azov, A.G., Bennett, R., Bhai, J., *et al.* (2021) Ensembl 2021. *Nucleic Acids Res.*, **49**, D884–D891.  
<https://doi.org/10.1093/nar/gkaa942>  
<http://www.ncbi.nlm.nih.gov/pmc/articles/PMC7778975>
2. Sayers, E.W., Beck, J., Bolton, E.E., Bourexis, D., Brister, J.R., Canese, K., Comeau, D.C., Funk, K., Kim, S., Klimke, W., *et al.* (2021) Database resources of the National Center for Biotechnology Information. *Nucleic Acids Res.*, **49**, D10–D17.  
<https://doi.org/10.1093/nar/gkaa892>  
<http://www.ncbi.nlm.nih.gov/pmc/articles/PMC7778943>
3. Landrum, M.J., Chitipiralla, S., Brown, G.R., Chen, C., Gu, B., Hart, J., Hoffman, D., Jang, W., Kaur, K., Liu, C., *et al.* (2020) ClinVar: improvements to accessing data. *Nucleic Acids Res.*, **48**, D835–D844.  
<https://doi.org/10.1093/nar/gkz972>  
<http://www.ncbi.nlm.nih.gov/pmc/articles/PMC6943040>
4. Stenson, P.D., Mort, M., Ball, E.V., Chapman, M., Evans, K., Azevedo, L., Hayden, M., Heywood, S., Millar, D.S., Phillips, A.D., *et al.* (2020) The Human Gene Mutation Database (HGMD®): optimizing its use in a clinical diagnostic or research setting. *Hum. Genet.*, **139**, 1197–1207.  
<https://doi.org/10.1007/s00439-020-02199-3>  
<http://www.ncbi.nlm.nih.gov/pmc/articles/PMC7497289>
5. 1000 Genomes Project Consortium, Auton, A., Brooks, L.D., Durbin, R.M., Garrison, E.P., Kang, H.M., Korbel, J.O., Marchini, J.L., McCarthy, S., McVean, G.A., *et al.* (2015) A global reference for human genetic variation. *Nature*, **526**, 68–74.  
<https://doi.org/10.1038/nature15393>  
<http://www.ncbi.nlm.nih.gov/pmc/articles/PMC4750478>
6. Lek, M., Karczewski, K.J., Minikel, E.V., Samocha, K.E., Banks, E., Fennell, T., O'Donnell-Luria, A.H., Ware, J.S., Hill, A.J., Cummings, B.B., *et al.* (2016) Analysis of protein-coding genetic variation in 60,706 humans. *Nature*, **536**, 285–291.  
<https://doi.org/10.1038/nature19057>  
<http://www.ncbi.nlm.nih.gov/pmc/articles/PMC5018207>

7. Karczewski,K.J., Francioli,L.C., Tiao,G., Cummings,B.B., Alföldi,J., Wang,Q., Collins,R.L., Laricchia,K.M., Ganna,A., Birnbaum,D.P., *et al.* (2020) The mutational constraint spectrum quantified from variation in 141,456 humans. *Nature*, **581**, 434–443.  
<https://doi.org/10.1038/s41586-020-2308-7>  
<http://www.ncbi.nlm.nih.gov/pmc/articles/PMC7334197>
8. Siepel,A., Bejerano,G., Pedersen,J.S., Hinrichs,A.S., Hou,M., Rosenbloom,K., Clawson,H., Spieth,J., Hillier,L.W., Richards,S., *et al.* (2005) Evolutionarily conserved elements in vertebrate, insect, worm, and yeast genomes. *Genome Res.*, **15**, 1034–1050.  
<https://doi.org/10.1101/gr.3715005>  
<http://www.ncbi.nlm.nih.gov/pmc/articles/PMC1182216>
9. Pollard,K.S., Hubisz,M.J., Rosenbloom,K.R. and Siepel,A. (2010) Detection of nonneutral substitution rates on mammalian phylogenies. *Genome Res.*, **20**, 110–121.  
<https://doi.org/10.1101/gr.097857.109>  
<http://www.ncbi.nlm.nih.gov/pmc/articles/PMC2798823>
10. UniProt Consortium (2021) UniProt: the universal protein knowledgebase in 2021. *Nucleic Acids Res.*, **49**, D480–D489.  
<https://doi.org/10.1093/nar/gkaa1100>  
<http://www.ncbi.nlm.nih.gov/pmc/articles/PMC7778908>
11. Tatusova,T.A. and Madden,T.L. (1999) BLAST 2 Sequences, a new tool for comparing protein and nucleotide sequences. *FEMS Microbiol. Lett.*, **174**, 247–250.  
<https://doi.org/10.1111/j.1574-6968.1999.tb13575.x>  
<http://www.ncbi.nlm.nih.gov/pubmed/10339815>
12. Yeo,G. and Burge,C.B. (2004) Maximum entropy modeling of short sequence motifs with applications to RNA splicing signals. *J. Comput. Biol. J. Comput. Mol. Cell Biol.*, **11**, 377–394.  
<https://doi.org/10.1089/1066527041410418>  
<http://www.ncbi.nlm.nih.gov/pubmed/15285897>
13. Tabaska,J.E. and Zhang,M.Q. (1999) Detection of polyadenylation signals in human DNA sequences. *Gene*, **231**, 77–86.  
[https://doi.org/10.1016/s0378-1119\(99\)00104-3](https://doi.org/10.1016/s0378-1119(99)00104-3)  
<http://www.ncbi.nlm.nih.gov/pubmed/10231571>
